# Supplementary material for: Gut Microbiota Modulation, Anti-Diabetic and Anti-Inflammatory Properties of Polyphenol Extract from Mung Bean Seed Coat (Vigna radiata L.)
Source: MDPI journal article supplement (doi:10.3390/nu14112275), 2022-05-28
Supplement: s1 [file s1]

**Table S1** Primer sequence, annealing temperature, and size of PCR products

| Target                                                           | Primer sequence                                        | T <sub>m</sub><br>(°C) | Size<br>(bp) | Reference                                                                       |
|------------------------------------------------------------------|--------------------------------------------------------|------------------------|--------------|---------------------------------------------------------------------------------|
| Total bacteria                                                   | ACTCCTACGGGAGGCAGCAGT<br>GTATTACCGCGGCTGCTGGCAC        | 56                     | 200          | Tannock, Munro, Harmsen, Welling, Smart and Gopal [1]                           |
| <i>Bifidobacterium</i> spp.                                      | TCGCGTC)C/T(GGTGTGAAAG<br>CCACATCCAGC)A/G(TCCAC        | 58                     | 243          | Rinttilä, Kassinen, Malinen, Krogus and Palva [2]                               |
| <i>Bacteroides fragilis</i> group                                | ATAGCCTTTCGAAAGRAAGAT<br>CCAGTATCAACTGCAATTTTA         | 50                     | 501          | Matsuki, Watanabe, Fujimoto, Miyamoto, Takada, Matsumoto, Oyaizu and Tanaka [3] |
| <i>Enterobacteriaceae</i>                                        | CATTGACGTTACCCGCAGAAGAA<br>GC<br>CTCTACGAGACTCAAGCTTGC | 57                     | 195          | Bartosch, Fite, Macfarlane and McMurdo [4]                                      |
| <i>Clostridium coccooides</i> – <i>Eubacteria. rectale</i> group | CGGTACCTGACTAAGAAGC<br>AGTTT(C/T)ATTCTTGCGAACG         | 51                     | 429          | Rinttilä, Kassinen, Malinen, Krogus and Palva [2]                               |
| <i>Clostridium leptum</i> group                                  | GCACAAGCAGTGGAGT<br>CTTCCTCCGTTTTGTCAA                 | 55                     | 239          | Matsuki, Watanabe,                                                              |

|                            |                                          |    |     |                                                                                                      |
|----------------------------|------------------------------------------|----|-----|------------------------------------------------------------------------------------------------------|
|                            |                                          |    |     | Fujimoto, Takada<br>and Tanaka [5]                                                                   |
| <i>F. prausnitzii</i> -    | ACCATGAGAGCCGGGGGG                       | 57 | 100 | Lund, Bjerrum and<br>Pedersen [6]                                                                    |
| <i>S. variable</i> group   | GGTTACCTTGTTACGACTT                      |    |     |                                                                                                      |
| <i>Lactobacillus</i> group | AGCAGTAGGGAATCTTCCA<br>CACCGCTACACATGGAG | 53 | 341 | Walter, Hertel,<br>Tannock, Lis,<br>Munro and<br>Hammes [7]                                          |
| <i>Prevotella</i>          | CACRGTAACGATGGATGCC<br>GGTCGGGTTGCAGACC  | 62 | 513 | Matsuki,<br>Watanabe,<br>Fujimoto,<br>Miyamoto,<br>Takada,<br>Matsumoto,<br>Oyaizu and<br>Tanaka [3] |

---

### References for Table S1

- [1] G. W. Tannock, K. Munro, H. J. M. Harmsen, G. W. Welling, J. Smart, P. K. Gopal, *Applied and Environmental Microbiology*. **2000**, 66, 2578-2588.
- [2] T. Rinttilä, A. Kassinen, E. Malinen, L. Krogus, A. Palva, *Journal of Applied Microbiology*. **2004**, 97, 1166-1177.
- [3] T. Matsuki, K. Watanabe, J. Fujimoto, Y. Miyamoto, T. Takada, K. Matsumoto, H. Oyaizu, R. Tanaka, *Applied and Environmental Microbiology*. **2002**, 68, 5445-5451.
- [4] S. Bartosch, A. Fite, G. T. Macfarlane, M. E. T. McMurdo, *Applied and Environmental Microbiology*. **2004**, 70, 3575-3581.

- [5] T. Matsuki, K. Watanabe, J. Fujimoto, T. Takada, R. Tanaka, *Applied and Environmental Microbiology*. **2004**, 70, 7220-7228.
- [6] M. Lund, L. Bjerrum, K. Pedersen, *Poultry Science*. **2010**, 89, 1217-1224.
- [7] J. Walter, C. Hertel, G. W. Tannock, C. M. Lis, K. Munro, W. P. Hammes, *Applied and Environmental Microbiology*. **2001**, 67, 2578-2585.
